# Supplementary material for: A Nuclear Long Non-Coding RNA LINC00618 Accelerates Ferroptosis in a Manner Dependent upon Apoptosis
Source: PubMed Central journal article supplement (PMC7791008; doi:10.1016/j.ymthe.2020.09.024), 2020-09-20
Supplement: mmc1.pdf [file mmc1.pdf]

YMTHE, Volume 29

## **Supplemental Information**

**A Nuclear Long Non-Coding RNA LINC00618**

**Accelerates Ferroptosis in a Manner**

**Dependent upon Apoptosis**

**Zuli Wang, Xiaowen Chen, Na Liu, Ying Shi, Yating Liu, Lianlian Ouyang, Samantha Tam, Desheng Xiao, Shuang Liu, Feiqiu Wen, and Yongguang Tao**

## Supplementary Figures

### Figure S1

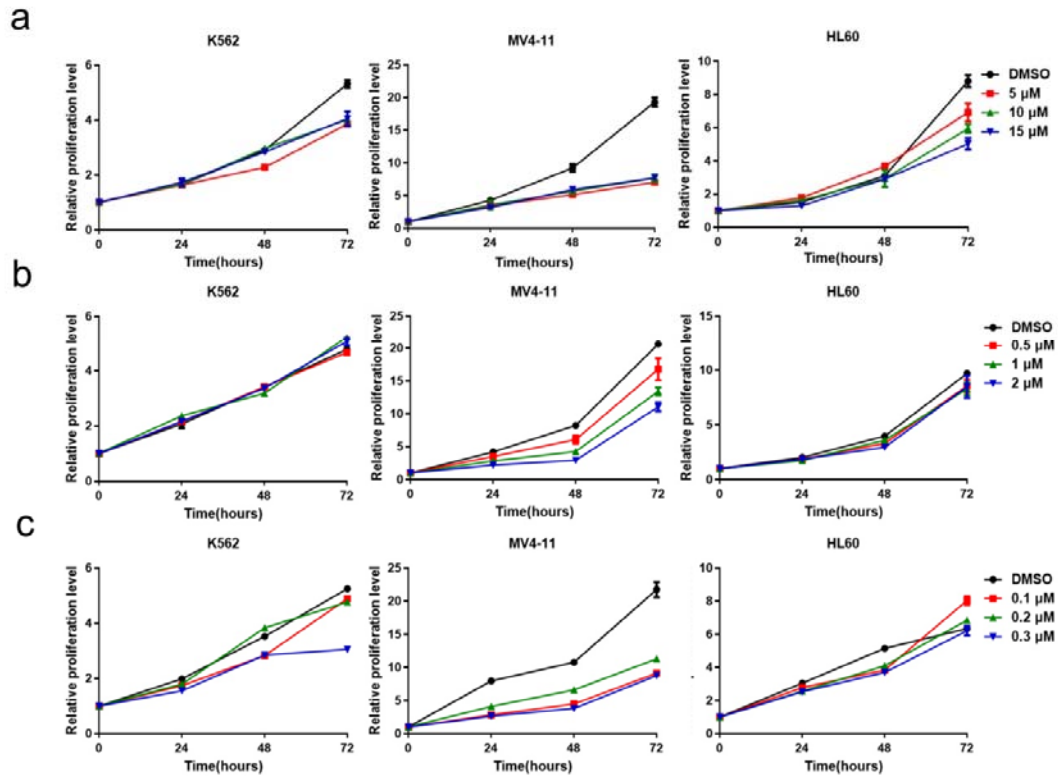

**Figure. S1. 6-mercaptopurine monohydrate, Imatinib Mesylate and AZD9496 affecting cell growth.**

**a** The relative proliferation levels of K562, HL60 and MV4-11 cells checked by MTS assays with the indicated doses of 6-Mercaptopurine Monohydrate treatment. DMSO served as control. **b** The relative proliferation levels of K562, HL60 and MV4-11 cells checked by MTS assays with the indicated doses of Imatinib Mesylate treatment. DMSO served as control. **c** The relative proliferation levels of K562, HL60 and MV4-11 cells checked by MTS assays with the indicated doses of AZD9496 treatment. DMSO served as control.

Figure S2

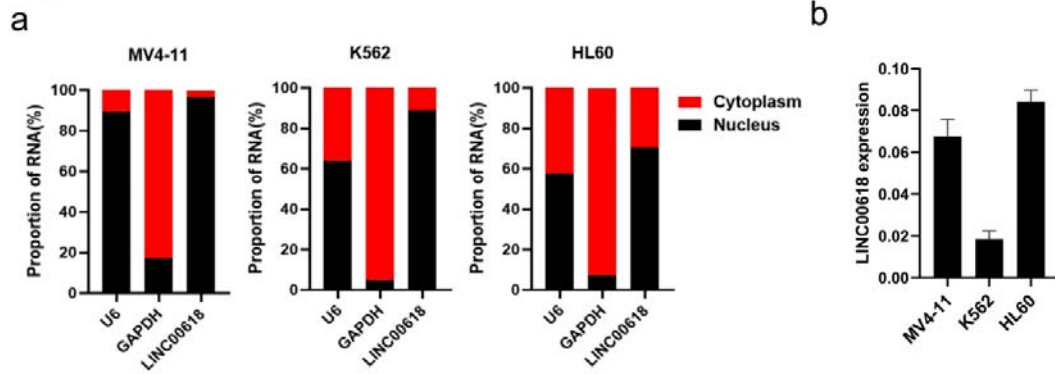

**Figure. S2. The expression and localization of LINC00618 in MV4-11, K562 and HL60 cells.**

**a** The RNA expression level of LINC00618 in MV4-11, K562 and HL60 cells. **b** The LINC00618 expression level in the nuclear and cytosolic fractions derived from K562 cells and HL60 cells

Figure S3

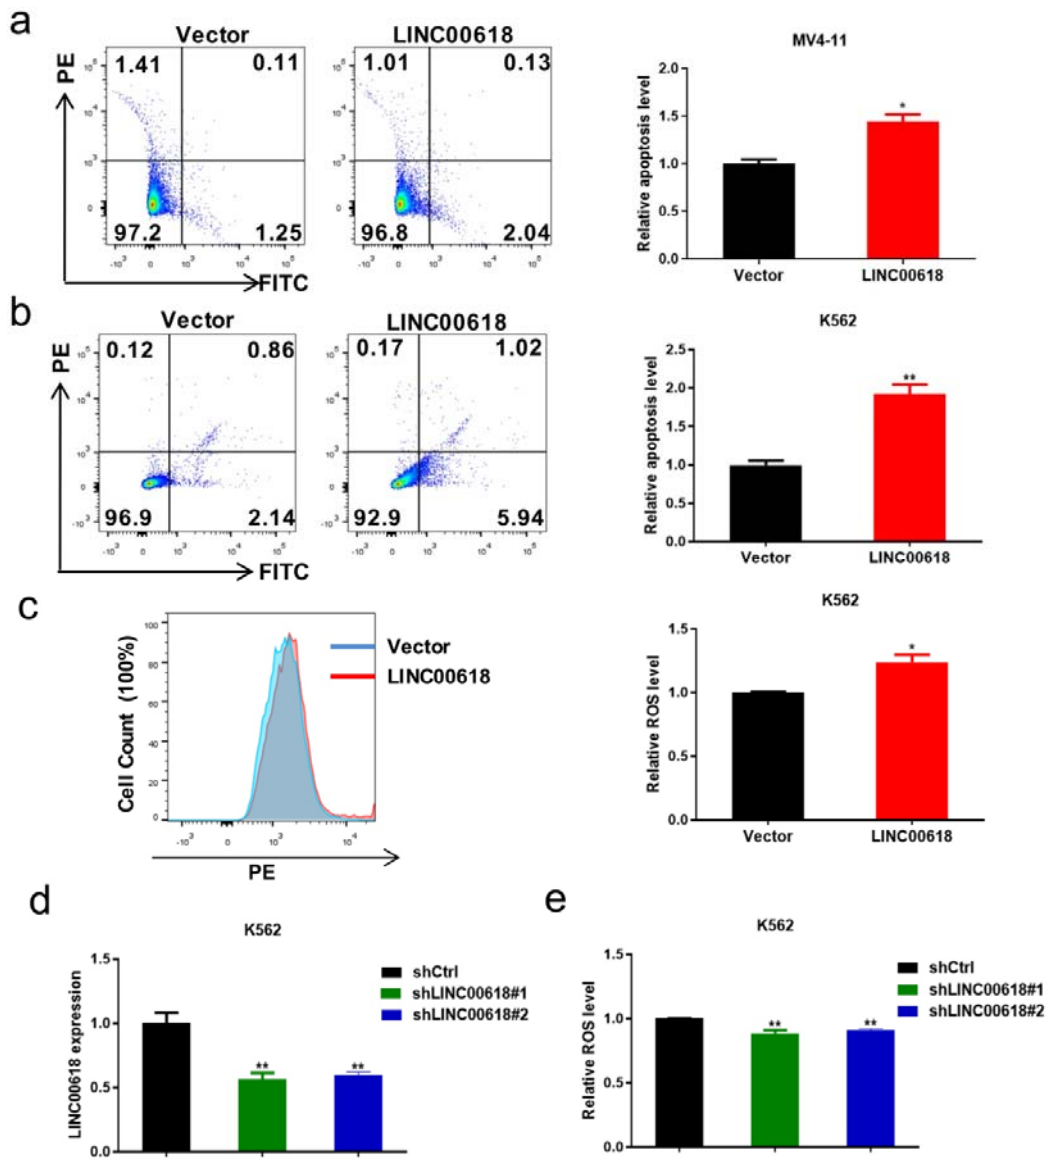

**Figure. S3. The role of LINC00618 in promoting cell apoptosis and ferroptosis.**

**a** Flow cytometry and statistical analysis showed that LINC00618 promoted apoptosis in MV4-11 cells stably overexpressing LINC00618. **b** Flow cytometry and statistical analysis showed that LINC00618 promoted apoptosis in K562 cells stably overexpressing LINC00618. **c** Flow cytometry and statistical analysis of ROS level in K562 cells stably overexpressing LINC00618. **d** qRT-PCR analyses of stably knockdown vector and LINC00618 in K562 cells. **e** Flow cytometry and statistical

analysis of ROS level in LINC00618-knockdown K562 cells.

Data are shown as the mean  $\pm$  SEM;  $n \geq 3$  independent experiments, two-tailed

Student's t-test: ns nonsignificant ( $p > 0.05$ ), \* $P < 0.05$ , \*\* $P < 0.01$ , \*\*\* $P < 0.001$ .

Figure S4

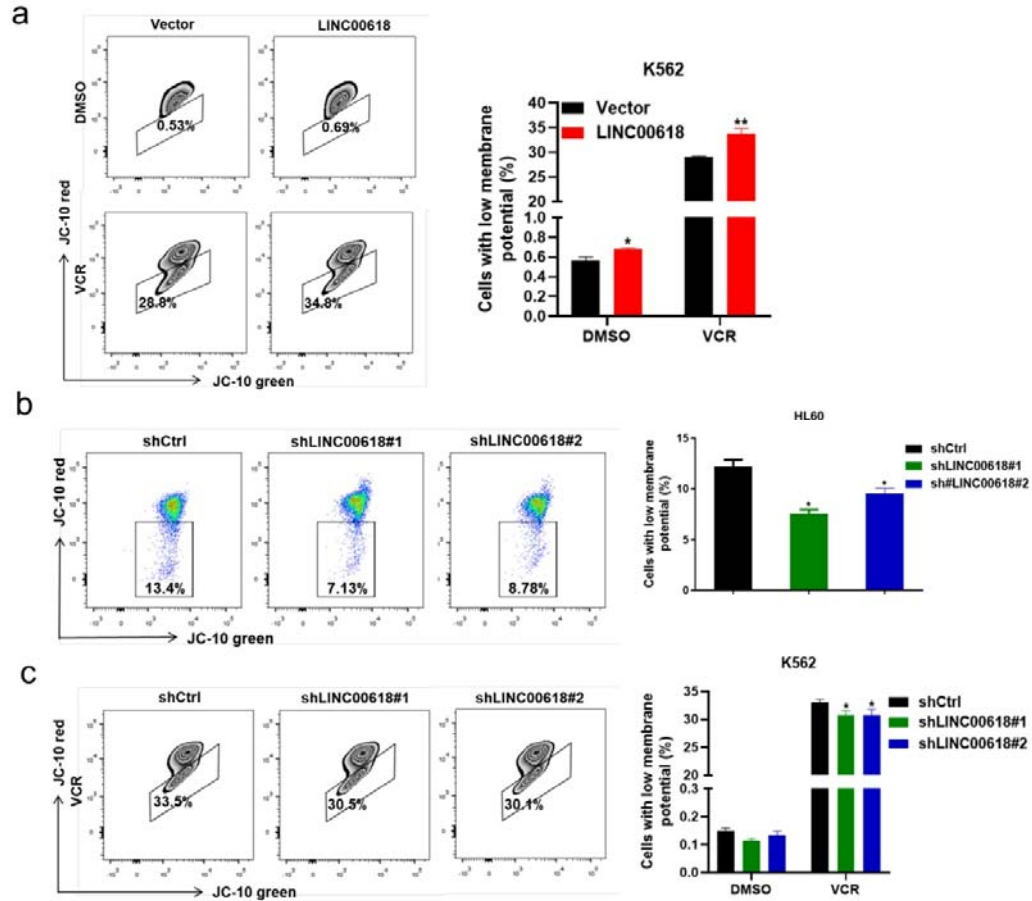

Figure. S4. The role of LINC00618 in mitochondrial membrane potential.

a Flow cytometry and statistical analysis of mitochondrial membrane potential using JC-10 in LINC00618-overexpressed K562 cells treated with VCR. DMSO served as control. b Flow cytometry and statistical analysis of mitochondrial membrane potential using JC-10 in LINC00618-knockdown HL60 cells. c Flow cytometry and statistical analysis of mitochondrial membrane potential using JC-10 in LINC00618-knockdown K562 cells treated with VCR. DMSO served as control.

Figure S5

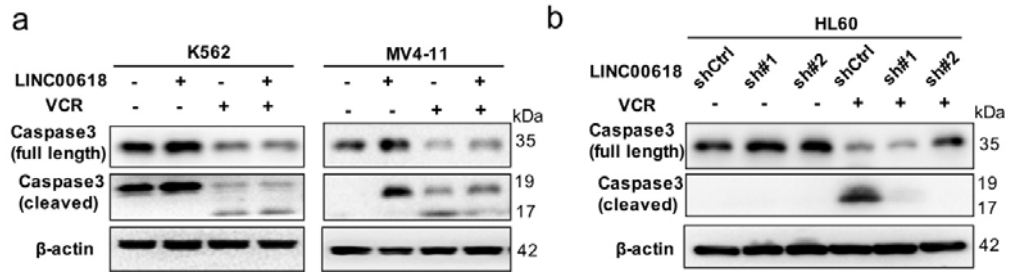

**Figure. S5. The effect of LINC00618 on apoptosis related proteins.**

**a** Expression level of apoptosis related proteins were measured by western blot in K562 and MV4-11 cells stably overexpressing LINC00618. **b** Expression level of apoptosis related proteins were measured by western blot in HL60 cells stably interfering LINC00618.

Figure S6

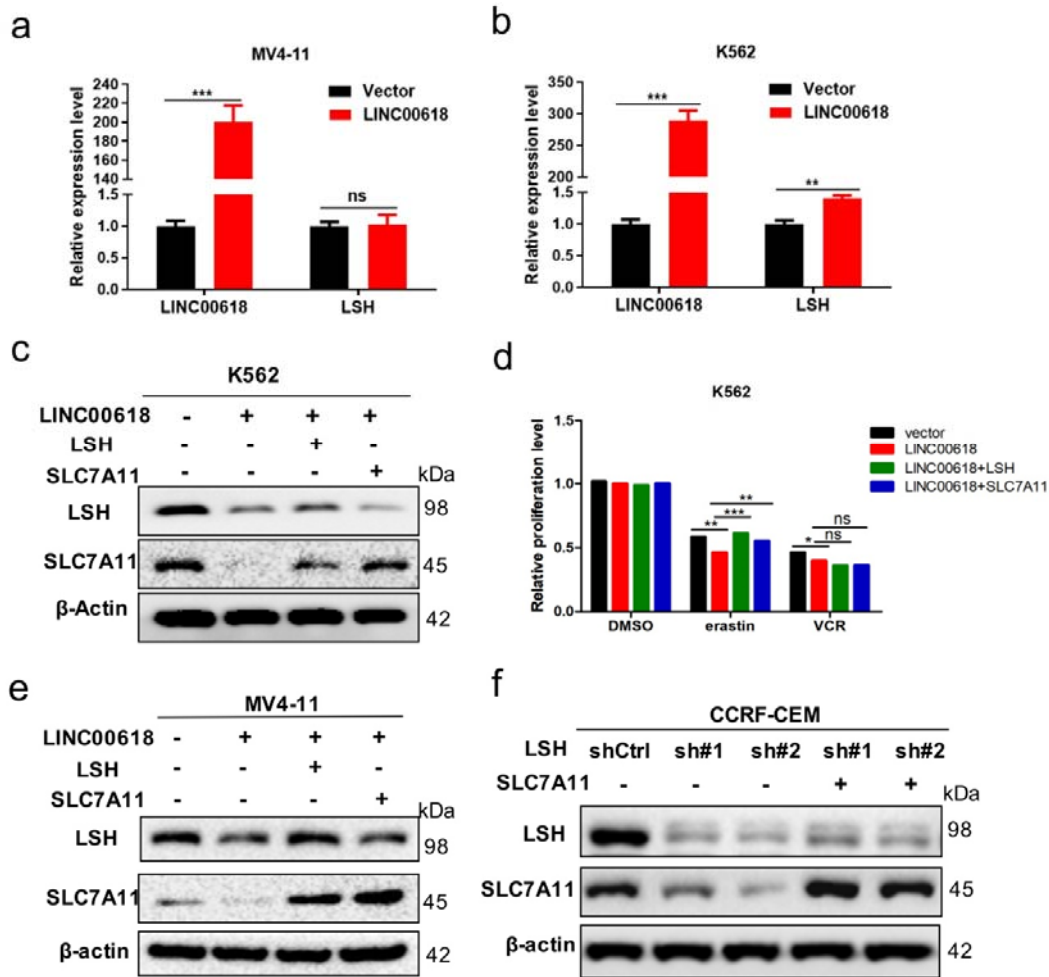

**Figure. S6. SLC7A11 is regulated by LINC00618 through LSH.**

**a** qRT-PCR analyses of LSH in MV4-11 cells stably overexpressing LINC00618. **b** qRT-PCR analyses of LSH in K562 cells stably overexpressing LINC00618. **c** Western blot analyses of LSH and SLC7A11 in K562 cells stably overexpressing LINC00618 with LSH or SLC7A11 overexpression. **d** MTS assay analyses of relative proliferation levels of K562 cell lines with erastin or VCR treatment from **c**. DMSO served as control. **d** Western blot analyses of LSH and SLC7A11 in MV4-11 cells stably overexpressing LINC00618 with LSH or SLC7A11 overexpression. **e** Western blot analyses of LSH and SLC7A11 in CCRF-CEM cells after the knockdown of LSH



with SLC7A11 overexpression.

## Supplementary Tables

**Table S1. Primer sequences used for RT-PCR**

| Name      | Full Name                                      | Gene ID | sequence                                                | Product Size(bp) |
|-----------|------------------------------------------------|---------|---------------------------------------------------------|------------------|
| LINC00618 | long intergenic non-protein coding RNA 618     | 145249  | F: AAGGGGTGGGGACACGTTG<br>R: TCTCTCTCCGTCAGCCTCAG       | 140              |
| LSH       | Lymphoid-specific helicase                     | 3070    | F: GATTTTGGATCGAATGCTGCCAG<br>R: ATGGACCCATCAAGCCTGCTGA | 141              |
| SLC7A11   | solute carrier family 7 member 11              | 23657   | F: TCCTGCTTTGGCTCCATGAACG<br>R: AGAGGAGTGTGCTTGCGGACAT  | 122              |
| GPX4      | glutathione peroxidase 4                       | 2879    | F: ACAAGAACGGCTGCGTGGTGAA<br>R: GCCACACACTTGTGGAGCTAGA  | 126              |
| ACSL4     | acyl-CoA synthetase long chain family member 4 | 2182    | F: GCTATCTCCTCAGACACACCGA<br>R: AGGTGCTCCAACCTGCCAGTA   | 139              |
| P53       | Tumor protein p53                              | 7157    | F: CCTCAGCATCTTATCCGAGTGG<br>R: TGGATGGTGGTACAGTCAGAGC  | 128              |
| CS        | citrate synthase                               | 1431    | F: CACAGGGTATCAGCCGAACCAA<br>R: CCAATACCGCTGCCTTCTCTGT  | 127              |
| ATP5G3    | ATP synthase membrane subunit c locus 3        | 518     | F: GCAACAGTAGGAGTGGCTGGTT<br>R: GCTTCAGACAAGGCAAATCCCAG | 137              |
| CBS       | cystathionine-beta-synthase                    | 875     | F: CATTGCCAGGAAGCTGAAGGAG<br>R: TTCCACCTCGTAGGTTGTCTGC  | 124              |
| HMGCR     | 3-hydroxy-3-methylglutaryl-CoA reductase       | 3156    | F: GACGTGAACCTATGCTGGTCAG<br>R: GGTATCTGTTTCAGCCACTAAGG | 119              |
| LPCAT3    | lysophosphatidylcholine acyltransferase 3      | 10162   | F: CAGGATACCTGGTCTGCTCCA<br>R: TGAAGAGCCAGTGGATGGTCTG   | 162              |
| TFRC      | transferrin receptor                           | 7037    | F: ATCGGTTGGTGCCACTGAATGG<br>R: ACAACAGTGGGCTGGCAGAAAC  | 131              |

**Table S2. Primer sequences used for ChIP**

| Name      | Sequence                     | Product size(bp) |
|-----------|------------------------------|------------------|
| SLC7A11#1 | F: AGTTGGTGTGACAGGCAGGCGCTTA | 122              |
|           | R: TCTCAATTCTCCACCTCCTCGTTCC |                  |
| SLC7A11#2 | F: GGAACGAGGAGGTGGAGAATTGAGA | 123              |
|           | R: CTCAGCGCTATAGTGTTACAGGTG  |                  |

**Table S3. Probe sequences used for ChIRP**

| Name        | Sequence             | modification  |
|-------------|----------------------|---------------|
| LINC00618#1 | CACCATGGATGCAACGTGTC | 3` Biotin-TEG |
| LINC00618#2 | TTCATCTCTGGAAACTGCC  | 3` Biotin-TEG |
| LINC00618#3 | TGGCTTCGATCCAGAGTGTC | 3` Biotin-TEG |
